# Supplementary material for: Identification of copper-regulated proteins in an oceanic diatom, Thalassiosira oceanica 1005
Source: Royal Society of Chemistry journal article supplement (doi:10.1039/d0mt00033g), 2020-05-14
Supplement: d0mt00033g3.xlsx [file d0mt00033g3.xlsx]

## Sheet: sheet1
Table S2. Protein annotation.
Spot id.	Fold change	T. oceanica protein	T. oceanica	RNAseq							Best annotated protein in NCBI						Best annotated protein in KEGG							Functional group
	(-Cu/+Cu)	accession id	protein name	gene id	PValue	FDR	fold change	Cu-replete	Cu-limited		Protein name	Accession	Coverage	Identity	E-value		Protein name	Entry	Similarity	Bits	E-vlaue	K number	Pathway id
1	2.07	YP_004072574	cytochrome c550	c23712_g1	0.536284	0.94083	-0.485409	0.75	0.48		cytochrome c550 [Thalassiosira oceanica CCMP1005]	YP_004072574	1	1	2e-118		PsbV; cytochrome c550	tps:THAPSDRAFT_bd1039	0.96	321	5e-110	K02720	ko00195	Photosynthesis
2	6.56	EJK49624	THAOC_31479	c7870_g1	9.16055e-25	1.44766e-22	2.4234	203.33	492.75		C2-domain-containing protein [Fragilariopsis cylindrus CCMP1102]	OEU14436	0.99	0.47	9e-36		C2-domain-containing protein	fcy:FRACYDRAFT_269584	0.46	127	6e-35			Vesicle trafficking
3	2.16	XP_002296360	acyl-CoA dehydrogenase	c16960_g1	0.00382449	0.0309122	1.70011	5.94667	10.11		acyl-CoA dehydrogenase [Thalassiosira pseudonana CCMP1335]	XP_002296360	1	1	0		acyl-CoA dehydrogenase-like protein	tps:THAPS_269316	0.92	1667	0	K06445	ko01212	Fatty acid metabolism
5	1.54	EJK67362	THAOC_11616	c4619_g1	2.94517e-05	0.00045279	1.32809	95.36	126.647		threonyl-tRNA synthetase [Fistulifera solaris]	GAX10978	0.99	0.67	0		threonyl-tRNA synthetase	tps:THAPSDRAFT_22770	0.84	1075	0	K01868	ko00970	Aminoacyl-tRNA biosynthesis
7	1.88	EJK67362	THAOC_11616	c4619_g1	2.94517e-05	0.00045279	1.32809	95.36	126.647		threonyl-tRNA synthetase [Fistulifera solaris]	GAX10978	0.99	0.67	0		threonyl-tRNA synthetase	tps:THAPSDRAFT_22770	0.84	1075	0	K01868	ko00970	Aminoacyl-tRNA biosynthesis
8	1.58	EJK51095	THAOC_29771	c19162_g1	0.166196	0.47373	-1.14679	1004.64	876.047		No hit						No hit
9	1.75	EJK51095	THAOC_29771	c19162_g1	0.166196	0.47373	-1.14679	1004.64	876.047		No hit						No hit
10	1.58	EJK51095	THAOC_29771	c19162_g1	0.166196	0.47373	-1.14679	1004.64	876.047		No hit						No hit
11	1.96	EJK62503	THAOC_16878	c9570_g1	0.840093	1	-1.02978	62.7033	60.89		regulator of chromosome condensation (RCC1) [Thraustotheca clavata]	OQR93933	0.9	0.26	2e-33		regulator of chromosome condensation (RCC1)-like protein	pif:PITG_06907	0.42	140	1e-32	K11493	ko03019	Messenger RNA biogenesis
18	1.6	EJK47576	THAOC_33694	c13191_g1	0.0690748	0.27374	-1.18127	151.403	128.17		No hit						No hit
19	1.51	EJK56070	THAOC_24110	c5774_g1	0.309857	0.661955	-1.09172	168.623	152.44		NADH dehydrogenase (ubiquinone) Fe-S protein 4 [Fistulifera solaris]	GAX13097	0.59	0.42	2e-14		NADH dehydrogenase (ubiquinone) Fe-S protein	fcy:FRACYDRAFT_268581	0.61	92	2e-19	K03937	ko00190	Oxidative phosphorylation
20	1.73	EJK74364	THAOC_03961	c9230_g1	0.0109542	0.0718932	-1.31096	301.59	230.053		No hit						No hit
21	1.64	EJK63584	THAOC_15749	c15611_g1	0.00123821	0.0120682	1.25055	81.3133	101.687		glutamate N-acetyltransferase / amino-acid N-acetyltransferase [Fistulifera solaris]	GAX26893	0.78	0.69	2e-130		arginine biosynthesis bifunctional protein argJ	pif:PITG_04698	0.66	244	9e-73	K00620	ko01230	Biosynthesis of amino acids
22	1.72	EJK68249	THAOC_10589	c4744_g1	0.418165	0.761514	-1.09863	288.343	262.457		ypt1-like rab-type small G protein [Thalassiosira pseudonana CCMP1335]	XP_002290315	0.84	0.96	1e-136		ypt1-like rab-type small G protein	tps:THAPSDRAFT_22792	0.98	390	1e-135	K07874	ko04131	Membrane trafficking
23	1.53	EJK74743	THAOC_03563	c10935_g1	0.0087073	0.0598861	-1.23139	407.803	331.173		NAC-domain-containing protein [Fragilariopsis cylindrus CCMP1102]	OEU15333	0.57	0.81	6e-56		transcription factor BTF3-like protein	bvg:104885950	0.58	153	1e-43	K01527
24	-2.03	EJK53643	THAOC_26871	c13958_g1	0.235917	0.581419	1.07924	567.527	612.5		geranylgeranyl reductase [Fragilariopsis cylindrus CCMP1102]	OEU21653	0.8	0.8	0		geranylgeranyl diphosphate reductase	tps:THAPSDRAFT_10234	0.94	675	0	K10960	ko00860	Chlorophyll metabolism
25	-2.12	EJK53643	THAOC_26871	c13958_g1	0.235917	0.581419	1.07924	567.527	612.5		geranylgeranyl reductase [Fragilariopsis cylindrus CCMP1102]	OEU21653	0.8	0.8	0		geranylgeranyl diphosphate reductase	tps:THAPSDRAFT_10234	0.94	675	0	K10960	ko00860	Chlorophyll metabolism
26	-2.9	EJK47917	THAOC_33331	c15229_g1	2.59515e-06	5.08519e-05	-1.58094	2853.1	1804.69		glyceraldehyde-3-phosphate dehydrogenase [Thalassiosira pseudonana CCMP1335]	XP_002290288	1	0.89	2e-135		GAPD4;glyceraldehyde-3-phosphate dehydrogenase	tps:THAPSDRAFT_28334	0.95	392	2e-134	K00134	ko01200	Glycolysis / Gluconeogenesis
28	-2.04	EJK55038	THAOC_25270	c18186_g1	3.50635e-09	1.1184e-07	-1.76155	15347.4	8712.44		fucoxanthin-chlorophyll a-c binding protein [Fragilariopsis cylindrus CCMP1102]	OEU20626	1	0.81	2e-106		Lhcf4，fucoxanthin chlorophyll a/c protein 4	tps:THAPSDRAFT_38667	0.91	307	3e-103	K08907	ko00196	Photosynthesis
29	-3.01	EJK51127	THAOC_29732	c1262_g1	0.0273978	0.143311	-1.24307	2824.61	2272.29		plastocyanin [Thalassiosira oceanica]	EJK71623	0.98	0.99	7e-105		PETE; plastocyanin	ehx:EMIHUDRAFT_65950	0.77	149	2e-43	K02638	ko00195	Photosynthesis
31	-2.34	EJK47429	THAOC_33854	c7726_g1	0.00421809	0.0334812	-1.34796	101.753	75.4867		small ubiquitin-like modifier [Phaeodactylum tricornutum CCAP 1055/1]	XP_002180525	0.93	0.75	1e-35		SUMO; small ubiquitin-like modifier	pti:PHATRDRAFT_27817	0.82	129	3e-35	K12160	ko03013	RNA transport
32	-2.37	EJK66277	THAOC_12811	c24742_g1	0.921933	1	-1.00259	72.31	72.1233		cytochrome c oxidase subunit 6b [Fragilariopsis cylindrus CCMP1102]	OEU22076	0.9	0.56	5e-34		cytochrome c oxidase subunit 6b	tps:THAPSDRAFT_31113	0.94	135	3e-39	K02267	ko00190	Oxidative phosphorylation
34	-1.89	EJK78098	nitrite reductase	c18075_g1	0.577822	0.872199	1.02749	81.8467	84.0967		nitrite reductase [Thalassiosira oceanica]	EJK78098	1	1	0		NIR_2; nitrite reductase-ferredoxin	tps:THAPSDRAFT_262125	0.92	990	0	K00366	ko00910	Assimilatory nitrate reduction
35	-1.56	YP_004072542	ATP synthase CF1 subunit beta	c21793_g1	6.30585e-05	0.000905935	-4.28358	0.956667	0.223333		ATP synthase CF1 subunit beta [Thalassiosira oceanica CCMP1005]	YP_004072542	1	1	0		atpB; ATP synthase CF1 beta chain	tps:THAPSDRAFT_bd1563	0.97	890	0	K02112	ko00195	Photosynthesis
36	-1.64	EJK53643	THAOC_26871	c13958_g1	0.235917	0.581419	1.07924	567.527	612.5		geranylgeranyl reductase [Fragilariopsis cylindrus CCMP1102]	OEU21653	0.8	0.8	0		geranylgeranyl diphosphate reductase	tps:THAPSDRAFT_10234	0.94	675	0	K10960	ko00860	Chlorophyll metabolism
39	-1.68	EJK54757	THAOC_25588	c7811_g1	0.3449	0.699895	1.07064	311.907	333.94		No hit						No hit
41	-1.51	EJK70534	THAOC_08095	c10607_g1	0.00893727	0.0610906	-1.27135	1416.52	1114.18		fucoxanthin chlorophyll a/c protein [Thalassiosira pseudonana CCMP1335]	XP_002295578	0.99	0.57	8e-75		Lhcx6_1; fucoxanthin chlorophyll a/c protein	tps:THAPS_30385	0.69	233	3e-74	K08907	ko00196	Photosynthesis
44	-1.69	EJK48286	THAOC_32932	c18186_g1	3.50635e-09	1.1184e-07	-1.76155	15347.4	8712.44		fucoxanthin chlorophyll a/c binding protein [Cyclotella cryptica]	CAA04401	1	0.85	6e-125		Lhcf9; fucoxanthin chlorophyll a/c protein	tps:THAPSDRAFT_268127	0.83	350	4e-120	K08907	ko00196	Photosynthesis
45	-1.57	EJK75762	THAOC_02510	c19352_g1	6.04946e-06	0.000109706	-1.66022	1774.59	1068.88		fucoxanthin chlorophyll a/c protein 4 [Thalassiosira pseudonana CCMP1335]	XP_002294845	0.83	0.74	1e-91		Lhcf4，fucoxanthin chlorophyll a/c protein 4	tps:THAPSDRAFT_38667	0.83	276	6e-91	K08907	ko00196	Photosynthesis
46	-1.6	EJK47511	THAOC_33758	c12895_g2	0.0680336	0.271032	1.16623	37.82	44.1067		Thylakoid lumenal 15 kDa protein [Ectocarpus siliculosus]	CBJ27829	0.98	0.5	3e-31		thylakoid lumenal 15 kDa protein 1	tps:THAPSDRAFT_8044	0.85	215	5e-68			Photosynthesis
49	-1.9	EJK70163	THAOC_08500	c5814_g1	0.000525168	0.00581484	-1.34761	1432.68	1049.09		oxygen-evolving enhancer protein 3 [Phaeodactylum tricornutum CCAP 1055/1]	XP_002180307	0.99	0.56	1e-69		OEE3; oxygen-evolving enhancer protein 3	pti:PHATRDRAFT_54499	0.56	220	5e-69	K08901	ko00195	Photosynthesis
50	-1.72	EJK72668	THAOC_05777	c11267_g1	0.000194082	0.00244102	-1.43273	325.693	227.323		fucoxanthin chlorophyll a/c protein [Phaeodactylum tricornutum CCAP 1055/1]	XP_002183454	0.95	0.53	9e-61		fucoxanthin chlorophyll a/c protein	tps:THAPSDRAFT_23808	0.87	306	4e-103	K08907	ko00196	Photosynthesis
52	-1.82	YP_004072584	RuBisCO small subunit	c20833_g1	2.67374e-05	0.000416853	-2.66598	4.33667	1.62667		RuBisCO small subunit [Thalassiosira oceanica CCMP1005]	YP_004072584	1	1	8e-102		rbcS;ribulose bisphosphate carboxlyase small chain	aaf:AuanCp072	0.82	203	1e-64	K01602	ko00710	Carbon fixation
53	-1.82	EJK45858	THAOC_35505	c10638_g1	0.128146	0.4096	-1.1481	392.65	342		translation factor tu domain 2 [Thalassiosira pseudonana CCMP1335]	XP_002291169	1	0.89	0		translation factor tu domain 2	tps:THAPSDRAFT_269148	0.94	1592	0	K03234	ko03012	Translation factors
54	1.59	EJK55940	THAOC_24261	c18361_g1	0.0364399	0.176415	-1.18586	46.2367	38.99		Xaa-Pro aminopeptidase [Fistulifera solaris]	GAX17497	0.98	0.6	0		X-prolyl aminopeptidase	ota:Ot13g02390	0.58	490	1e-161	K01262	ko01002	Amino acid metabolism
55	2.08	EJK77039	THAOC_01158	c18647_g1	1.06183e-17	9.53569e-16	1.83489	20.39	37.4133		long-chain acyl-CoA synthetase [Fistulifera solaris]	GAX14005	0.91	0.58	0		Long-chain-fatty-acid--CoA ligase	mfu:LILAB_20360	0.59	469	2e-153	K01897	ko01212	Fatty acid metabolism
58	3.04	EJK49989	THAOC_31088	c15129_g1	0.244961	0.59106	-1.1682	33.8467	28.9733		polyadenylate-binding protein [Fistulifera solaris]	GAX18941	0.98	0.64	0		pabA; polyadenylate binding protein	tps:THAPSDRAFT_13224	0.78	688	0	K13126	ko03015	mRNA surveillance pathway
59	-1.77	YP_004072585	RuBisCO large subunit	c20833_g1	2.67374e-05	0.000416853	-2.66598	4.33667	1.62667		RuBisCO large subunit [Thalassiosira oceanica CCMP1005]	YP_004072585	1	1	0		rbcL;ribulose-bisphosphate carboxylase large chain	tps:THAPSDRAFT_bd2088	0.99	1006	0	K01601	ko00710	Carbon fixation
62	-1.92	XP_002293787	phosphoadenosine-phosphosulphate reductase	c10589_g1	2.26025e-24	3.43798e-22	-2.44163	385.847	155.89		phosphoadenosine-phosphosulphate reductase [Thalassiosira pseudonana CCMP1335]	XP_002293787	1	1	0		phosphoadenosine phosphosulfate reductase	fcy:FRACYDRAFT_211685	0.73	660	0	K00390	ko00920	Sulfur metabolism
65	-1.7	EJK46456	THAOC_34872	c5304_g1	2.06519e-09	6.82887e-08	-1.82097	188.24	103.373		pseudouridylate synthase [Thalassiosira pseudonana CCMP1335]	XP_002293927	1	0.77	0		pseudouridylate synthase	tps:THAPSDRAFT_269765	0.88	526	0	K06177	ko03016	Transfer RNA biogenesis
71	-1.79	XP_002294845	fucoxanthin chlorophyll a/c protein	c20784_g1	0.347627	0.702591	-1.08613	1228.79	1115.96		fucoxanthin chlorophyll a/c protein 4 [Thalassiosira pseudonana CCMP1335]	XP_002294845	1	1	2e-144		Lhcf4; fucoxanthin chlorophyll a/c protein	tps:THAPSDRAFT_38667	1	490	2e-143	K08907	ko00196	Photosynthesis
72	1.64	EJK67933	THAOC_10956	c22399_g1	0.0466501	0.210479	-1.24183	156.603	126.107		Eukaryotic initiation factor 1 [Ectocarpus siliculosus]	CBJ29821	0.89	0.82	2e-76		eukaryotic translation initiation factor 1A	pif:PITG_11630	0.91	203	4e-64	K03236	ko03013	RNA transport
